# Supplementary material for: Inhibitory Mechanism of Advanced Glycation End-Product Formation by Avenanthramides Derived from Oats through Scavenging the Intermediates
Source: MDPI journal article supplement (doi:10.3390/foods11121813), 2022-06-20
Supplement: s1 [file s1]

## **Supporting Information**

### **Inhibitory mechanism of advanced glycation end-product formation by avenanthramides derived from oats through scavenging the intermediates**

Pei Zhu, Ying Zhang, Dianwei Zhang, Luxuan Han, Huilin Liu\*, and Baoguo Sun

Beijing Technology and Business University, 11 Fucheng Road, Beijing, 100048, China.

**\*Corresponding author: Huilin Liu**

**Tel: (86 10) 68984003;**

**Fax: (86 10) 68984857;**

**Email: liuhuilin@btbu.edu.cn**

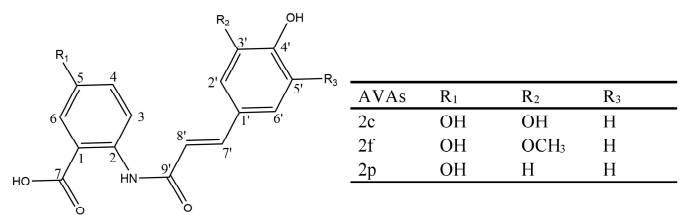

**Figure S1** The chemical structure of AVAs 2p, AVAs 2c and AVAs 2f.

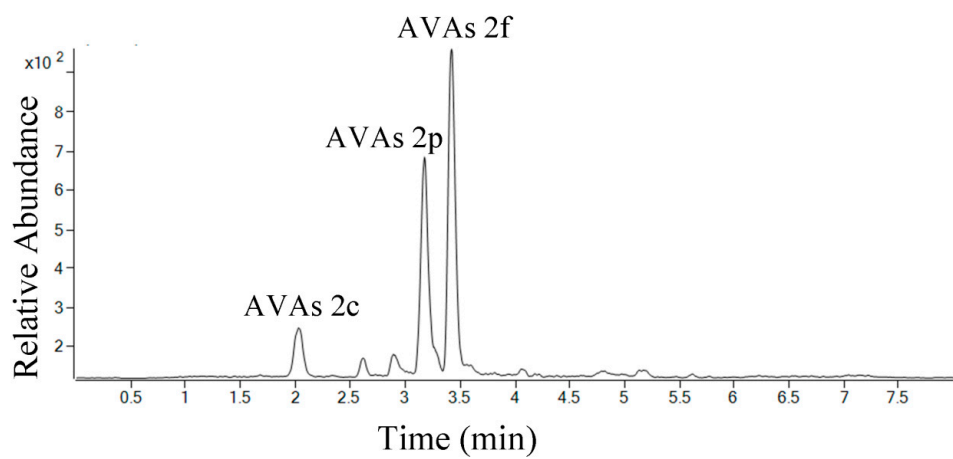

**Figure S2** HPLC chromatogram of AVAs extracts.

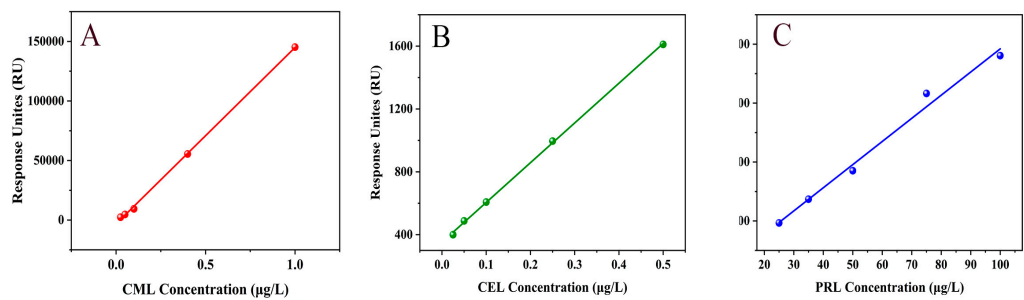

**Figure S3** The standard curve of CML, CEL and PRL.

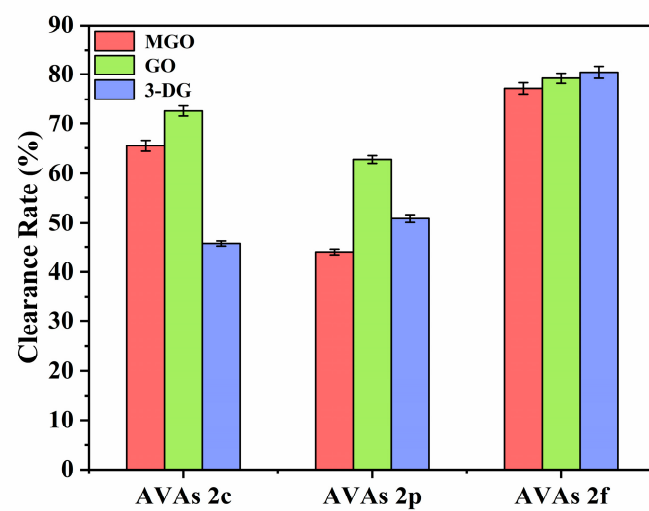

**Figure S4** The clearance of the dicarbonyl compounds MGO, GO and 3-DG by AVAs 2p, 2c and 2f.
